# Supplementary figures and images for: BET Inhibition as a Rational Therapeutic Strategy for Invasive Lobular Breast Cancer
Source: Oxford University Press journal article supplement (doi:10.1158/1078-0432.ccr-19-0713), 2019-08-13

**Fig S2**

**A**

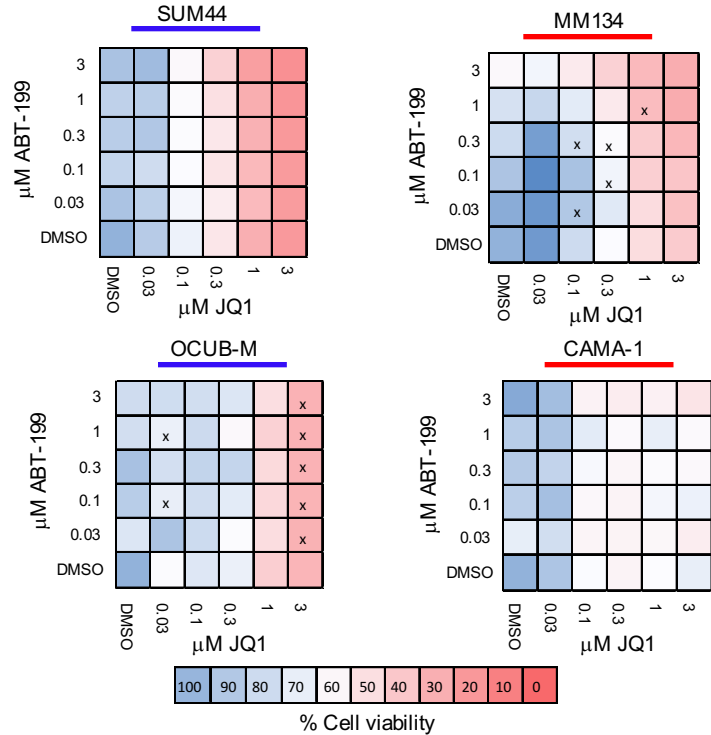

**B**

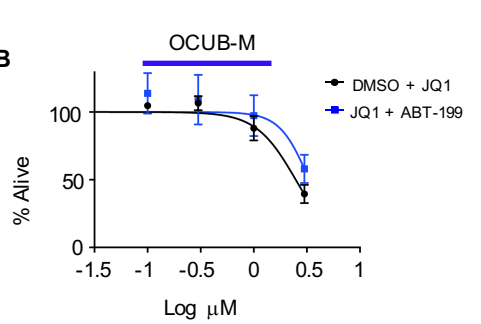

**C**

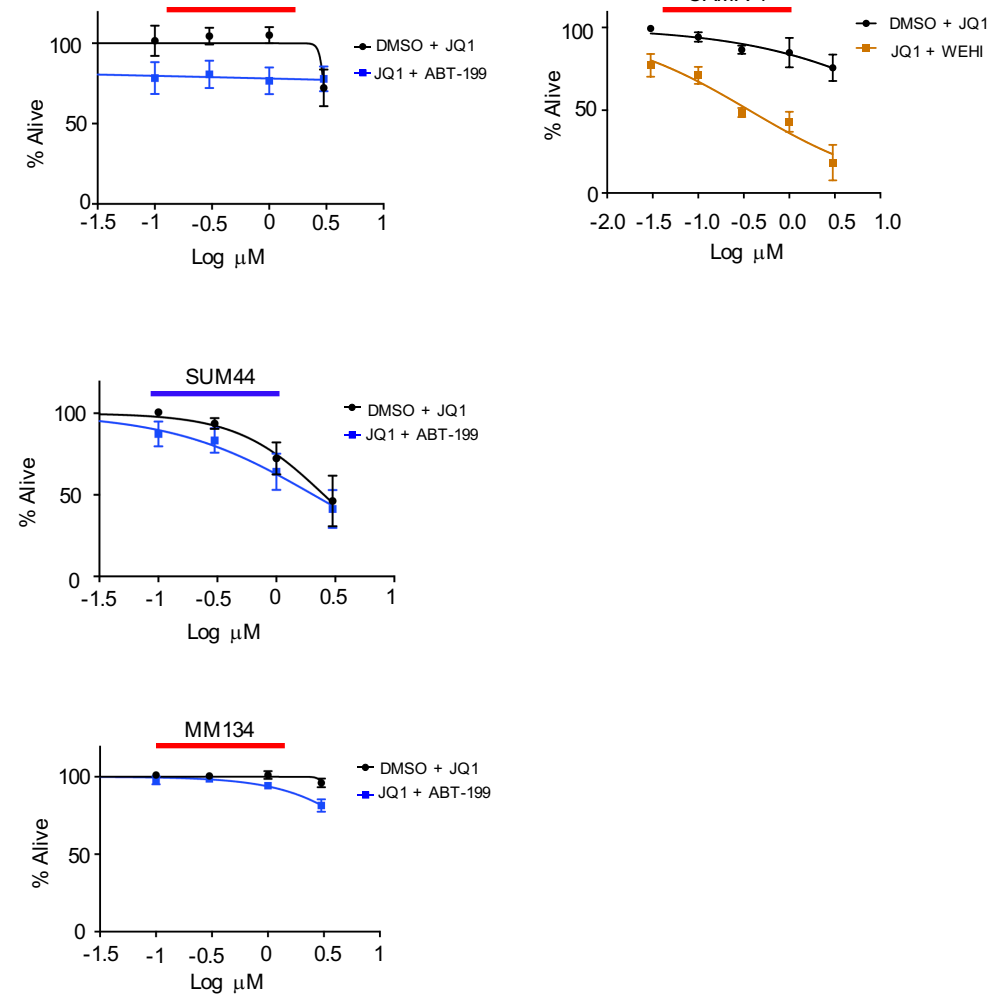

Supplement: 10780432ccr190713-sup-218062_3_supp_5681560_pvpp8w.pdf [file 10780432ccr190713-sup-218062_3_supp_5681560_pvpp8w.pdf]
